# Supplementary material for: Increased plasma lipid levels exacerbate muscle pathology in the mdx mouse model of Duchenne muscular dystrophy
Source: PubMed Central journal article supplement (PMC5596936; doi:10.1186/s13395-017-0135-9), 2017-09-12
Supplement: 13395_2017_135_MOESM1_ESM.pdf [file 13395_2017_135_MOESM1_ESM.pdf]

|                                             |        | WT            |               |               |               | ApoE           |                |               |                | mdx           |               |               |                | mdx-ApoE |        |        |          |
|---------------------------------------------|--------|---------------|---------------|---------------|---------------|----------------|----------------|---------------|----------------|---------------|---------------|---------------|----------------|----------|--------|--------|----------|
|                                             |        | WT            | ApoE          | mdx           | mdx-ApoE      | WT             | ApoE           | mdx           | mdx-ApoE       | WT            | ApoE          | mdx           | mdx-ApoE       | WT       | ApoE   | mdx    | mdx-ApoE |
| <b>Data by Gender: 7 Month Western Diet</b> |        |               |               |               |               |                |                |               |                |               |               |               |                |          |        |        |          |
| Gastrocnemius                               |        |               |               |               |               |                |                |               |                |               |               |               |                |          |        |        |          |
| Total Area                                  | Male   | 0.244(0.016)  | 0.286(0.009)  | 0.208(0.012)  | 0.183(0.010)  | 194.35(10.119) | 185.85(16.045) | 162.5(18.2)   | 163.23(15.295) | 150.7(11.116) | 146.92(4.337) | 134.3(12.52)  | 171.15(2.750)  | 0.8634   | 0.0805 | 0.8604 | 0.8922   |
|                                             | Female | 0.225(0.018)  | 0.232(0.008)  | 0.229(0.022)  | 0.166(0.021)  | 17.497(0.839)  | 17.752(3.055)  | 14.021(1.185) | 17.028(1.001)  | 16.777(1.115) | 15.607(0.736) | 14.076(0.629) | 17.022(1.340)  | 0.9999   | 0.9999 | 0.9999 | 0.9917   |
|                                             | P      |               |               |               |               | 0.0444         | 0.0634         | 0.539         | 0.9917         |               |               |               |                |          |        |        |          |
| % Fat                                       | Male   | 1.257(0.727)  | 0.060(0.041)  | 1.363(0.319)  | 14.411(3.288) | 17.497(0.839)  | 17.752(3.055)  | 14.021(1.185) | 17.028(1.001)  | 16.777(1.115) | 15.607(0.736) | 14.076(0.629) | 17.022(1.340)  | 0.9999   | 0.9999 | 0.9999 | 0.9917   |
|                                             | Female | 0.690(0.231)  | 0.239(0.073)  | 1.684(0.727)  | 19.678(2.363) | 17.497(0.839)  | 17.752(3.055)  | 14.021(1.185) | 17.028(1.001)  | 16.777(1.115) | 15.607(0.736) | 14.076(0.629) | 17.022(1.340)  | 0.9999   | 0.9999 | 0.9999 | 0.9917   |
|                                             | P      |               |               |               |               | 0.9999         | 0.9999         | 0.3349        | 0.9917         |               |               |               |                |          |        |        |          |
| % Fibrosis                                  | Male   | 3.475(0.217)  | 3.341(0.267)  | 7.835(0.676)  | 25.466(2.647) | 56.921(1.817)  | 54.561(0.919)  | 54.759(2.791) | 53.712(1.227)  | 54.321(2.277) | 55.947(0.805) | 54.435(0.138) | 52.58.2(2.367) | 0.8032   | 0.9686 | 0.9999 | 0.9768   |
|                                             | Female | 3.360(0.177)  | 4.166(0.699)  | 8.301(0.488)  | 30.250(4.766) | 54.321(2.277)  | 55.947(0.805)  | 54.435(0.138) | 52.58.2(2.367) | 54.321(2.277) | 55.947(0.805) | 54.435(0.138) | 52.58.2(2.367) | 0.8032   | 0.9686 | 0.9999 | 0.9768   |
|                                             | P      |               |               |               |               | 0.9999         | 0.9977         | 0.9998        | 0.3601         |               |               |               |                |          |        |        |          |
| % Myofiber                                  | Male   | 98.741(0.729) | 99.928(0.038) | 97.801(0.983) | 79.262(3.380) | 29.511(1.113)  | 28.062(0.631)  | 28.017(1.805) | 27.516(0.765)  | 27.893(1.474) | 28.757(0.461) | 27.720(0.042) | 26.751(1.469)  | 0.8098   | 0.9864 | 0.9996 | 0.9699   |
|                                             | Female | 99.310(0.231) | 99.758(0.070) | 96.503(0.674) | 70.486(8.497) | 27.893(1.474)  | 28.757(0.461)  | 27.720(0.042) | 26.751(1.469)  | 27.893(1.474) | 28.757(0.461) | 27.720(0.042) | 26.751(1.469)  | 0.8098   | 0.9864 | 0.9996 | 0.9699   |
|                                             | P      |               |               |               |               | 0.9999         | 0.9999         | 0.9976        | 0.1655         |               |               |               |                |          |        |        |          |
| Triceps brachii                             |        |               |               |               |               |                |                |               |                |               |               |               |                |          |        |        |          |
| Total Area                                  | Male   | 0.166(0.009)  | 0.168(0.011)  | 0.179(0.009)  | 0.169(0.014)  | 41.557(0.608)  | 43.123(6.361)  | 36.078(2.961) | 43.632(2.463)  | 40.196(1.605) | 36.250(1.154) | 34.736(2.284) | 39.667(2.517)  | 0.9975   | 0.4389 | 0.9976 | 0.7899   |
|                                             | Female | 0.133(0.003)  | 0.136(0.007)  | 0.192(0.008)  | 0.136(0.002)  | 40.196(1.605)  | 43.123(6.361)  | 36.078(2.961) | 43.632(2.463)  | 40.196(1.605) | 36.250(1.154) | 34.736(2.284) | 39.667(2.517)  | 0.9975   | 0.4389 | 0.9976 | 0.7899   |
|                                             | P      |               |               |               |               | 0.2662         | 0.239          | 0.9463        | 0.9694         |               |               |               |                |          |        |        |          |
| % Fat                                       | Male   | 2.591(0.298)  | 1.449(0.078)  | 1.993(0.334)  | 9.001(1.919)  | 4.210(0.052)   | 4.190(0.245)   | 3.890(0.065)  | 4.253(0.116)   | 3.964(0.073)  | 3.876(0.075)  | 3.843(0.108)  | 4.128(0.157)   | 0.6944   | 0.4176 | 0.9991 | 0.9283   |
|                                             | Female | 2.863(0.323)  | 0.847(0.154)  | 1.936(0.392)  | 17.640(6.149) | 4.210(0.052)   | 4.190(0.245)   | 3.890(0.065)  | 4.253(0.116)   | 3.964(0.073)  | 3.876(0.075)  | 3.843(0.108)  | 4.128(0.157)   | 0.6944   | 0.4176 | 0.9991 | 0.9283   |
|                                             | P      |               |               |               |               | 0.9999         | 0.9991         | 0.9999        | 0.1055         |               |               |               |                |          |        |        |          |
| % Fibrosis                                  | Male   | 4.414(0.455)  | 5.135(0.506)  | 6.440(0.904)  | 19.334(1.792) | 3.0827(0.064)  | 3.013(0.160)   | 2.798(0.054)  | 3.085(0.101)   | 2.752(0.053)  | 2.765(0.071)  | 2.778(0.079)  | 3.028(0.165)   | 0.2748   | 0.48   | 0.9999 | 0.992    |
|                                             | Female | 3.597(0.106)  | 3.592(0.068)  | 9.221(1.018)  | 22.547(2.931) | 2.752(0.053)   | 2.765(0.071)   | 2.778(0.079)  | 3.028(0.165)   | 2.752(0.053)  | 2.765(0.071)  | 2.778(0.079)  | 3.028(0.165)   | 0.2748   | 0.48   | 0.9999 | 0.992    |
|                                             | P      |               |               |               |               | 0.9896         | 0.8829         | 0.5926        | 0.2393         |               |               |               |                |          |        |        |          |
| % Myofiber                                  | Male   | 9.7414(0.292) | 98.542(0.075) | 96.418(0.895) | 81.282(2.759) | 79.135(2.300)  | 78.969(11.048) | 65.696(2.616) | 81.634(5.143)  | 68.697(3.035) | 65.187(3.053) | 63.858(4.314) | 76.013(6.933)  | 0.7218   | 0.4201 | 0.9994 | 0.9232   |
|                                             | Female | 97.137(0.323) | 99.153(0.154) | 95.668(0.723) | 76.417(6.831) | 79.135(2.300)  | 78.969(11.048) | 65.696(2.616) | 81.634(5.143)  | 68.697(3.035) | 65.187(3.053) | 63.858(4.314) | 76.013(6.933)  | 0.7218   | 0.4201 | 0.9994 | 0.9232   |
|                                             | P      |               |               |               |               | 0.9999         | 0.9993         | 0.9991        | 0.1798         |               |               |               |                |          |        |        |          |

Expressed as mean(SEM). Abbreviations - M: male, F: female, WT: wild-type, CO: cardiac output, EF: ejection fraction, FS: fractional shortening, SV: stroke volume, LV: left ventricle, LVDD: LV diastolic diameter, LVSD: LV systolic diameter, LVDV: LV diastolic volume, LVSV: LV systolic volume
