# Supplementary material for: Increased plasma lipid levels exacerbate muscle pathology in the mdx mouse model of Duchenne muscular dystrophy
Source: PubMed Central journal article supplement (PMC5596936; doi:10.1186/s13395-017-0135-9), 2017-09-12

## A 4m Western Diet

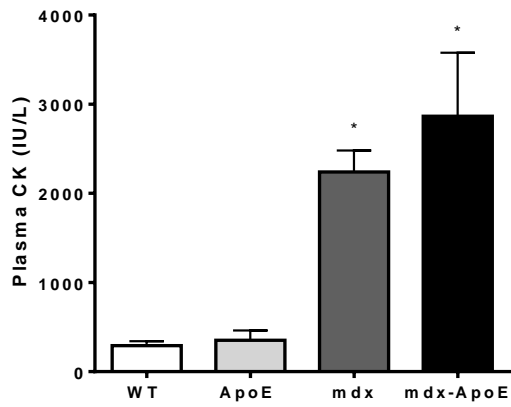

## B

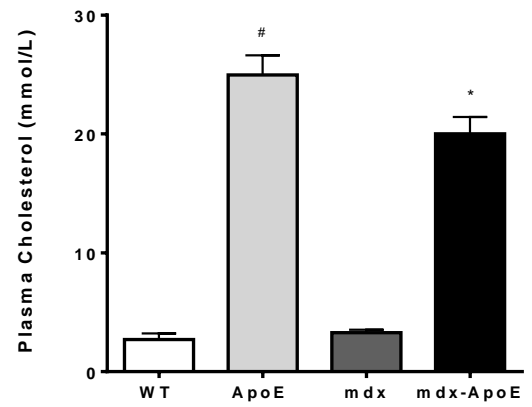

## C

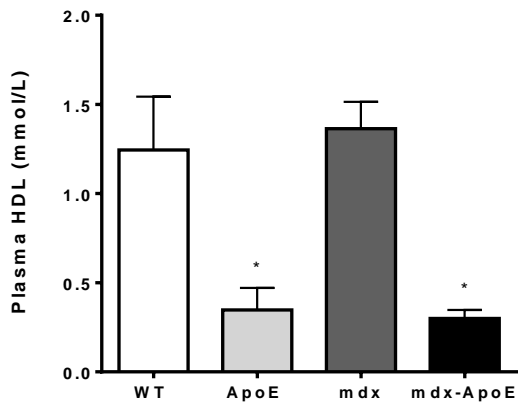

## D

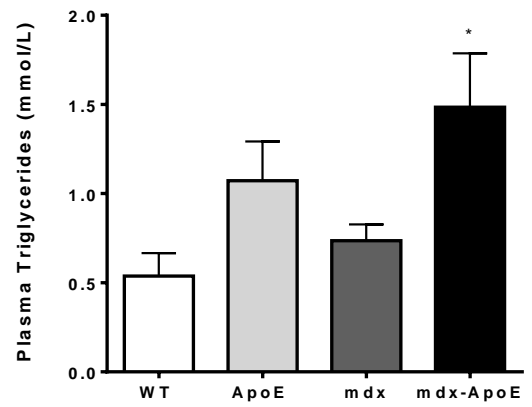

Supplement: 13395_2017_135_MOESM2_ESM.pdf [file 13395_2017_135_MOESM2_ESM.pdf]
